# Supplementary material
Source: publisher site journal article supplement (https://www.dovepress.com/article/supplementary_file/614156/614156%20Supplementary%20Material%201.docx)
Supplement: Supplementary file 1 [file 614156%20Supplementary%20Material%201.docx]

**Supplementary Material 1:Baseline demographic characteristics and outcomes of the development and validation sets.**

| Variables | Total (n = 376) | Validation group (n = 113) | Training group (n = 263) | *P* |
| --- | --- | --- | --- | --- |
|
| Age, M (Q₁, Q₃) | 55.00 (44.75, 64.25) | 55.00 (45.00, 66.00) | 55.00 (44.50, 64.00) | 0.53 |
| Course Of Disease, M (Q₁, Q₃) | 12.00 (3.00, 47.25) | 12.00 (4.00, 48.00) | 12.00 (3.00, 44.50) | 0.50 |
| Medication Adherence, n(%) |  |  |  | 0.95 |
| good | 182 (48.40) | 55 (48.67) | 127 (48.29) |  |
| poor | 194 (51.60) | 58 (51.33) | 136 (51.71) |  |
| Disease Recurrence, n(%) |  |  |  | 0.63 |
| no | 279 (74.20) | 82 (72.57) | 197 (74.90) |  |
| yes | 97 (25.80) | 31 (27.43) | 66 (25.10) |  |
| Work Status, n(%) |  |  |  | 0.86 |
| no | 203 (53.99) | 61 (53.98) | 142 (53.99) |  |
| employed or student | 101 (26.86) | 32 (28.32) | 69 (26.24) |  |
| retiree | 72 (19.15) | 20 (17.70) | 52 (19.77) |  |
| Marital Status, n(%) |  |  |  | 0.94 |
| married | 324 (86.17) | 97 (85.84) | 227 (86.31) |  |
| unmarried | 31 (8.24) | 9 (7.96) | 22 (8.37) |  |
| other | 21 (5.59) | 7 (6.19) | 14 (5.32) |  |
| Insurance Type, n(%) |  |  |  | 0.97 |
| employee health insurance | 160 (42.55) | 49 (43.36) | 111 (42.21) |  |
| resident medical insurance | 195 (51.86) | 58 (51.33) | 137 (52.09) |  |
| out of pocket | 21 (5.59) | 6 (5.31) | 15 (5.70) |  |
| Therapeutic Regimen, n(%) |  |  |  | 0.89 |
| Chinese medicine alone | 72 (19.15) | 20 (17.70) | 52 (19.77) |  |
| hormones and/or immunosuppressants | 287 (76.33) | 88 (77.88) | 199 (75.67) |  |
| chemotherapy | 17 (4.52) | 5 (4.42) | 12 (4.56) |  |
| AchRab, n(%) |  |  |  | 0.93 |
| negative | 49 (13.03) | 15 (13.27) | 34 (12.93) |  |
| positive | 327 (86.97) | 98 (86.73) | 229 (87.07) |  |
| MUSKab, n(%) |  |  |  | 0.90 |
| negative | 365 (97.07) | 109 (96.46) | 256 (97.34) |  |
| positive | 11 (2.93) | 4 (3.54) | 7 (2.66) |  |
| Gender, n(%) |  |  |  | 0.17 |
| male | 210 (55.85) | 57 (50.44) | 153 (58.17) |  |
| female | 166 (44.15) | 56 (49.56) | 110 (41.83) |  |
| MGFA, n(%) |  |  |  | 0.77 |
| Ⅰ | 152 (40.43) | 42 (37.17) | 110 (41.83) |  |
| Ⅱ | 88 (23.40) | 28 (24.78) | 60 (22.81) |  |
| Ⅲ | 58 (15.43) | 18 (15.93) | 40 (15.21) |  |
| Ⅳ | 67 (17.82) | 20 (17.70) | 47 (17.87) |  |
| Ⅴ | 11 (2.93) | 5 (4.42) | 6 (2.28) |  |
| Educational Level, n(%) |  |  |  | 0.89 |
| junior high school and below | 179 (47.61) | 55 (48.67) | 124 (47.15) |  |
| high school | 72 (19.15) | 20 (17.70) | 52 (19.77) |  |
| college diploma and above | 125 (33.24) | 38 (33.63) | 87 (33.08) |  |
| Place of Residence, n(%) |  |  |  | 0.75 |
| urban | 185 (49.20) | 57 (50.44) | 128 (48.67) |  |
| rural | 191 (50.80) | 56 (49.56) | 135 (51.33) |  |
| Thymus Type, n(%) |  |  |  | 0.84 |
| thymoma | 57 (15.16) | 19 (16.81) | 38 (14.45) |  |
| non-thymoma | 75 (19.95) | 22 (19.47) | 53 (20.15) |  |
| normal thymus | 244 (64.89) | 72 (63.72) | 172 (65.40) |  |
| Thymectomy, n(%) |  |  |  | 0.75 |
| no | 244 (64.89) | 72 (63.72) | 172 (65.40) |  |
| yes | 132 (35.11) | 41 (36.28) | 91 (34.60) |  |
| Comorbidities, n(%) |  |  |  | 0.55 |
| no | 124 (32.98) | 38 (33.63) | 86 (32.70) |  |
| cancer | 14 (3.72) | 2 (1.77) | 12 (4.56) |  |
| autoimmune disease | 38 (10.11) | 10 (8.85) | 28 (10.65) |  |
| other | 200 (53.19) | 63 (55.75) | 137 (52.09) |  |
| History Of Crisis, n(%) |  |  |  | 0.95 |
| no | 359 (95.48) | 108 (95.58) | 251 (95.44) |  |
| yes | 17 (4.52) | 5 (4.42) | 12 (4.56) |  |
| BMQ necessity, Mean ± SD | 14.47 ± 4.98 | 14.32 ± 5.14 | 14.53 ± 4.92 | 0.70 |
| BMQ concerns, Mean ± SD | 13.23 ± 5.03 | 12.93 ± 5.14 | 13.36 ± 4.99 | 0.45 |
| BIPQ cognition, Mean ± SD | 27.80 ± 10.58 | 28.04 ± 10.25 | 27.69 ± 10.73 | 0.77 |
| BIPQ emotion, Mean ± SD | 11.80 ± 4.32 | 12.38 ± 4.67 | 11.55 ± 4.15 | 0.09 |
| BIPQ understanding, Mean ± SD | 7.14 ± 1.66 | 7.14 ± 1.64 | 7.14 ± 1.67 | 0.99 |
